# Supplementary material
Source: Springer Nature journal article supplement (https://www.springermedizin.de/resource/supplementary/12889_2014_6447_MOESM1_ESM.pdf/9498082)
Supplement: MOESM1 [file 9498082]

University Logo

**PARENTAL QUESTIONNAIRE FOR THE CHILD'S ENERGY BALANCE-RELATED  
BEHAVIOR**

**Final**

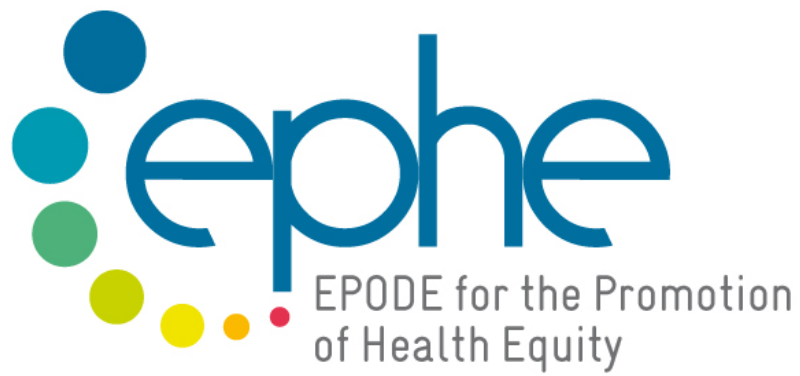

Student number

**PART I**

**General questions**

Socio-demographic information

**S1. This questionnaire is filled in by:**

- The mother
- The stepmother
- The father
- The stepfather
- The grandmother
- The grandfather
- The caregiver

**S2. How old is your child?**

- 6 years old
- 7 years old
- 8 years old
- 9 years old and above

**S3. What is the sex of your child?**

- Boy
- Girl

**S4. Which age group do you belong to?**

- Below 20
- 20-24
- 25-30
- 31-35
- 36-40
- above 40

**S5. How many years have you/your partner spend in full time study including school?**

Me

- Less than 6 years
- 6-8 years
- 9-11 years
- 12-14 years
- 15-17 years
- More than 17 years

Spouse/partner

- Less than 6 years
- 6-8 years
- 9-11 years
- 12-14 years
- 15-17 years
- More than years 17

I don't have a spouse /partner

**S6. How would you define your/your partners' current labour status?**

Me

Spouse/partner

- |                                                                                                                                                                      |                                                                                                                                                                      |                                                        |
|----------------------------------------------------------------------------------------------------------------------------------------------------------------------|----------------------------------------------------------------------------------------------------------------------------------------------------------------------|--------------------------------------------------------|
| <input type="checkbox"/> Carry out a job or profession, including unpaid work for a family business or holding, including an apprenticeship or paid traineeship etc. | <input type="checkbox"/> Carry out a job or profession, including unpaid work for a family business or holding, including an apprenticeship or paid traineeship etc. | <input type="checkbox"/> I don't have a spouse/partner |
| <input type="checkbox"/> Unemployed                                                                                                                                  | <input type="checkbox"/> Unemployed                                                                                                                                  |                                                        |
| <input type="checkbox"/> Student, further training, unpaid work experience                                                                                           | <input type="checkbox"/> Student, further training, unpaid work experience                                                                                           |                                                        |
| <input type="checkbox"/> In retirement or early retirement or has given up business                                                                                  | <input type="checkbox"/> In retirement or early retirement or has given up business                                                                                  |                                                        |
| <input type="checkbox"/> Permanently disabled                                                                                                                        | <input type="checkbox"/> Permanently disabled                                                                                                                        |                                                        |
| <input type="checkbox"/> In compulsory military or community service                                                                                                 | <input type="checkbox"/> In compulsory military or community service                                                                                                 |                                                        |
| <input type="checkbox"/> Fulfilling domestic tasks                                                                                                                   | <input type="checkbox"/> Fulfilling domestic tasks                                                                                                                   |                                                        |
| <input type="checkbox"/> Other inactive person                                                                                                                       | <input type="checkbox"/> Other inactive person                                                                                                                       |                                                        |

**S7. Which of the types of organisation you/your spouse work/worked for?**

Me

Spouse/partner

- |                                                                             |                                                                             |                                                        |
|-----------------------------------------------------------------------------|-----------------------------------------------------------------------------|--------------------------------------------------------|
| <input type="checkbox"/> Central or local government                        | <input type="checkbox"/> Central or local government                        | <input type="checkbox"/> I don't have a spouse/partner |
| <input type="checkbox"/> Other public sector (such as education and health) | <input type="checkbox"/> Other public sector (such as education and health) |                                                        |
| <input type="checkbox"/> A state-owned enterprise                           | <input type="checkbox"/> A state-owned enterprise                           |                                                        |
| <input type="checkbox"/> A private firm                                     | <input type="checkbox"/> A private firm                                     |                                                        |
| <input type="checkbox"/> Self-employed                                      | <input type="checkbox"/> Self-employed                                      |                                                        |
| <input type="checkbox"/> Other                                              | <input type="checkbox"/> Other                                              |                                                        |

*Household information*

**S8. How many adults live in your household, including yourself?**

- 1 person
- 2 persons
- 3-4 persons
- 5-6 persons
- More than 6 persons

**S9. How many children (below 18 years old) live in your household?**

- 1 child
- 2 children
- 3 children
- 4 children
- More than 4 children

**S10. Which of the description below comes closest to how you feel about your household's income nowadays?**

- Living comfortably on present income
- Coping on present income
- Finding it difficult on present income
- Finding it very difficult on present income

**S11. Please consider the income of all household members and any income which may be received by the household as a whole. What is the main source of income in your household?**

- Wages or salaries
- Income from self-employment (excluding farming)
- Income from farming
- Pensions
- Unemployment/redundancy benefit
- Any other social benefits or grants
- Income from investment, savings, insurance property
- Income from other sources

For the following statements that people have made about their food situation, please mark how do they apply in your situation, over the last 12 months;

**S12. “The food that I bought just didn’t last, and I didn’t have money to get more”. Was that:**

- Often true
- Sometimes true
- Never true
- Don’t know

**S13. “I couldn’t afford to eat balanced meals”. Was that:**

- Often true
- Sometimes true
- Never true
- Don’t know

**S14. In the last 12 months did you in your household ever cut up the size of meals or skip meals because there was not enough money for food?**

- Yes
- No

*If NO, go to question S15*

**S14a. If yes, how often did this happen?**

- Almost every month
- Some months but not every month
- Only 1 or 2 months
- Don’t know

**S15. In the last 12 months, did you ever eat less than you felt you should because there wasn’t enough money for food?**

- Yes
- No
- Don’t know

**S16. In the last 12 months, were you ever hungry but didn’t eat because there wasn’t enough money for food?**

- Yes
- No
- Don’t know

**a. Some questions about fruit and vegetables***You child's fruit and vegetable consumption habits***F1. How often does your child usually eat fresh fruit?**

- Never
- Less than one day per week
- One day per week
- 2-4 days a week
- 5-6 days a week
- Every day, once a day
- Every day, twice a day
- Every day, more than twice a day

**F2. How often does your child usually eat salad or grated vegetables?**

- Never
- Less than one day per week
- One day per week
- 2-4 days a week
- 5-6 days a week
- Every day, once a day
- Every day, twice a day
- Every day, more than twice a day

**F3. How often does your child usually eat other raw vegetables?**

- Never
- Less than one day per week
- One day per week
- 2-4 days a week
- 5-6 days a week
- Every day, once a day
- Every day, twice a day
- Every day, more than twice a day

**F4. How often does your child usually eat potatoes?**

- Never
- Less than one day per week
- One day per week
- 2-4 days a week
- 5-6 days a week
- Every day, once a day
- Every day, twice a day
- Every day, more than twice a day

**F5. How often does your child usually eat cooked vegetables (incl. vegetable soup)?**

- Never
- Less than one day per week
- One day per week
- 2-4 days a week
- 5-6 days a week
- Every day, once a day
- Every day, twice a day
- Every day, more than twice a day

**F6. I do not give my child some foods, because they cost too much.**

- I fully agree
- I agree a somewhat
- Neither agree nor disagree
- I disagree somewhat
- I fully disagree

**F7. What do you consider to be the three most important characteristics of your child's meal? Please tick three boxes**

- |                                                      |                                                                     |
|------------------------------------------------------|---------------------------------------------------------------------|
| <input type="checkbox"/> Nutritious                  | <input type="checkbox"/> Home-prepared                              |
| <input type="checkbox"/> Provides energy             | <input type="checkbox"/> Organic                                    |
| <input type="checkbox"/> Exhibits high variety       | <input type="checkbox"/> Vegetarian                                 |
| <input type="checkbox"/> Satisfies my child's liking | <input type="checkbox"/> Taking into account religious requirements |

Some questions about fruit only

**F8. How many serving portions of fruits does your child eat per day?**

- None
- 1(*serving portion-country specific*)
- 2 (*serving portions-country specific*)
- 3(*serving portions-country specific*)
- 4 (*serving portions-country specific*)
- 5 or more (*serving portions-country specific*)

**F9. Do you think that your child eats much or a little fruit?**

- Very much fruit
- Much fruit
- Not much, not little
- Little fruit
- Very little fruit

**F10. How much fruit do you think your child should eat to have a healthy diet?**

- No fruit
- 1-3 pieces per week
- 4-6 pieces per week
- 1 piece per day
- 2 pieces per day
- 3 pieces per day
- 4 pieces per day
- 5 pieces per day or more

**F11. My spouse/partner and/or I often encourage our child to eat fruits.**

- I fully agree
- I agree somewhat
- Neither agree nor disagree
- I disagree somewhat
- I fully disagree

**F12. We often eat fruit together the whole family.**

- I fully agree
- I agree somewhat
- Neither agree nor disagree
- I disagree somewhat
- I fully disagree

**F13. It is a habit of my child to eat fruit every day.**

- I fully agree
- I agree somewhat
- Neither agree nor disagree
- I disagree somewhat
- I fully disagree

**F14. Does your child usually bring fruit with him/her at school?**

- Yes, always
- Yes, most days
- Sometimes
- Seldom
- Never



**F15. Do you and/or your spouse/partner tell your child to eat fruit every day?**

- Yes, always
- Yes, most days
- Sometimes
- Seldom
- Never

**F16. Is your child allowed to eat as much fruit as (s)he likes at home?**

- Yes, always
- Yes, most days
- Sometimes
- Seldom
- Never

**F17. Are there usually different kinds of fruits available in your home?**

- Yes, always
- Yes, most days
- Sometimes
- Seldom
- Never

**F18. Do you or your spouse/partner usually cut up fruit for your child in between meals?**

- Yes, always
- Yes, most days
- Sometimes
- Seldom
- Never

*Some questions about vegetables only*

**F19. How many serving portions of vegetables does your child eat per day?**

- None
- 1(*serving portion-country specific*)
- 2 (*serving portions-country specific*)
- 3(*serving portions-country specific*)
- 4 (*serving portions-country specific*)
- 5 or more (*serving portions-country specific*)

**F20. Do you think that your child eats many or few vegetables?**

- Very many vegetables
- Many vegetables
- Not many, not few
- Few vegetables
- Very few vegetables

**F21. How many vegetables do you think your child should eat to have a healthy diet?**

- No vegetables
- 1 - 3 portions (serving spoons) per week
- 4 - 6 portions (serving spoons) per week
- 1 portion (serving spoon) every day
- 2 portions (serving spoons) every day
- 3 portions (serving-spoons) every day
- 4 portions (serving-spoons) every day
- 5 or more portions (serving spoons) every day

**F22. My spouse/partner and/or I often encourage our child to eat vegetables every day.**

- I fully agree
- I agree somewhat
- Neither agree nor disagree
- I disagree somewhat
- I fully disagree

**F23. We often eat vegetables together the whole family.**

- I fully agree
- I agree somewhat
- Neither agree nor disagree
- I disagree somewhat
- I fully disagree

**F24. It is a habit for my child to eat vegetables every day.**

- I fully agree
- I agree somewhat
- Neither agree nor disagree
- I disagree somewhat
- I fully disagree

**F25. Does your child usually bring vegetables with him/her at school?**

- Yes, always
- Yes, most days
- Sometimes
- Seldom
- Never

**F26. Which of the following vegetables does your child like or dislike?**

*Please, tick one box in every line*

|             | Like very much           | Like a bit               | Dislike a bit            | Dislike very much        | Have not tried           |
|-------------|--------------------------|--------------------------|--------------------------|--------------------------|--------------------------|
| Tomatoes    | <input type="checkbox"/> | <input type="checkbox"/> | <input type="checkbox"/> | <input type="checkbox"/> | <input type="checkbox"/> |
| Cucumber    | <input type="checkbox"/> | <input type="checkbox"/> | <input type="checkbox"/> | <input type="checkbox"/> | <input type="checkbox"/> |
| Lettuce     | <input type="checkbox"/> | <input type="checkbox"/> | <input type="checkbox"/> | <input type="checkbox"/> | <input type="checkbox"/> |
| Cabbage     | <input type="checkbox"/> | <input type="checkbox"/> | <input type="checkbox"/> | <input type="checkbox"/> | <input type="checkbox"/> |
| Spinach     | <input type="checkbox"/> | <input type="checkbox"/> | <input type="checkbox"/> | <input type="checkbox"/> | <input type="checkbox"/> |
| Leak        | <input type="checkbox"/> | <input type="checkbox"/> | <input type="checkbox"/> | <input type="checkbox"/> | <input type="checkbox"/> |
| Green beans | <input type="checkbox"/> | <input type="checkbox"/> | <input type="checkbox"/> | <input type="checkbox"/> | <input type="checkbox"/> |
| Onion       | <input type="checkbox"/> | <input type="checkbox"/> | <input type="checkbox"/> | <input type="checkbox"/> | <input type="checkbox"/> |
| Carrots     | <input type="checkbox"/> | <input type="checkbox"/> | <input type="checkbox"/> | <input type="checkbox"/> | <input type="checkbox"/> |
| Broccoli    | <input type="checkbox"/> | <input type="checkbox"/> | <input type="checkbox"/> | <input type="checkbox"/> | <input type="checkbox"/> |
| Cauliflower | <input type="checkbox"/> | <input type="checkbox"/> | <input type="checkbox"/> | <input type="checkbox"/> | <input type="checkbox"/> |
| Green peas  | <input type="checkbox"/> | <input type="checkbox"/> | <input type="checkbox"/> | <input type="checkbox"/> | <input type="checkbox"/> |

**F27. Do you and/or your spouse/partner tell your child to eat vegetables every day?**

- Yes, always
- Yes, most days
- Sometimes
- Seldom
- Never

**F28. Is your child allowed to eat as many vegetables as (s)he would like at home?**

- Yes, always
- Yes, most days
- Sometimes
- Seldom
- Never

Student number

**F29. Are there usually different kinds of vegetables available in your home?**

- Yes, always
- Yes, most days
- Sometimes
- Seldom
- Never

**F30. Do you or your spouse/partner usually cut up vegetables for your child in between meals?**

- Yes, always
- Yes, most days
- Sometimes
- Seldom
- Never

**F31. Are there usually vegetables served with dinner (or lunch) at your home?**

- Yes, always
- Yes, most days
- Sometimes
- Seldom
- Never

**Some Questions about water**

In this section we mean water from the tap or water from bottles (artesian well water, spring water, mineral water and sparkling water).

**G1. How many times a day does your child usually drink water?**

- Never
- Less than once a day
- Once a day
- 2-4 times a day
- 5-6 times a day
- More than 6 times a day

**G2. When your child drinks water, how many glass(es) does (s)he drink?**

- None
- 1 glass
- 2 glasses
- 3 glasses
- 4 glasses
- 5 or more glasses

**G3. Does your child drink water during mealtime?**

- Always
- Often
- Sometimes
- Not often
- Never

**G4. Does your child drink water between meals?**

- Always
- Often
- Sometimes
- Not often
- Never

**G5. Does your child drink water during/after sports or playing?**

- Always
- Often
- Sometimes
- Not often
- Never

**Some questions about fruit juices**

*By fruit juices we mean fruit juices made from concentrated fruit juices and 100% freshly blended fruit juices.*

**J1. How many times a week does your child usually drink fruit juices?**

- Never
- Less than once a week
- Once a week
- 2-4 days a week
- 5-6 days a week
- Every day, once a day
- Every day, more than once a day

**J2. In which situation(s) is your child most likely to drink fruit juices?**

*You may tick more than one boxes*

- During the weekend
- Breakfast
- Lunch
- Dinner
- At school
- While watching television
- As a thirst quencher between meal
- During/after sports
- At birthdays/parties
- (S)he never drinks fruit juices

**J3. On a day that your child drinks fruit juices, how many glass(es), carton(s), bottle(s) or can(s) does (s)he drink? Please tick a box in every column**

**a. Glasses or small cartons (250 ml)**

- None
- 1 glass/cartons
- 2 glasses/cartons
- 3 glasses/cartons
- 4glasses/cartons
- 5 or more glasses/cartons

**b. Regular cans/cartons/ bottles (330ml)**

- None
- 1 can/carton/bottle
- 2 cans/cartons/bottles
- 3 cans/cartons/ bottles
- 4 cans/cartons/ bottles
- 5 or more cans/cartons/ bottles s

**J4. There are fruit juices available at home for my child.**

- Always
- Often
- Sometimes
- Not often
- Never

**J5. I pay attention to the amount of fruit juices my child drinks.**

- Always
- Often
- Sometimes
- Not often
- Never

**J6. If my child asks for fruit juices, I will give it to him/her.**

- Always
- Often
- Sometimes
- Not often
- Never

**J7. My child is allowed to take fruit juices whenever (s)he wants.**

- Always
- Often
- Sometimes
- Not often
- Never

**J8. I negotiate with my child how much fruit juices (s)he is allowed to drink.**

- Always
- Often
- Sometimes
- Not often
- Never

**J9. How often do you tell your child that fruit juices are not good for him/her?**

- Always
- Often
- Sometimes
- Not often
- Never

**J10. How often do you tell your child that fruit juices make him/her fat?**

- Always
- Often
- Sometimes
- Not often
- Never

**J11. If I would like to drink fruit juices, I would restrain myself because of the presence of my child.**

- Always
- Often
- Sometimes
- Not often
- Never

**J12. If I prohibit my child from drinking fruit juices, (s)he tries to drink anyway.**

- Always
- Often
- Sometimes
- Not often
- Never

**J13. If I prohibit my child from drinking fruit juices, I find it difficult to stick to my rule(s) if (s)he starts negotiating.**

- Always
- Often
- Sometimes
- Not often
- Never

**J14. I give fruit juices to my child as a reward or to comfort him/her.**

- Always
- Often
- Sometimes
- Not often
- Never

**J15. How often do you and/or your spouse/partner drink fruit juices together with your child?**

- Never
- Less than once a week
- Once a week
- 2-4 days a week
- 5-6 days a week
- Every day, once a day
- Every day, more than once a day



**Some questions about soft drinks**

*By soft drinks, we mean fizzy drinks and fruit squash, but NOT diet drinks and fruit juices. Examples:*

*Fizzy drinks are: cola, 7-up, Pepsi, Fanta, Sprite etc.*

*Fruit squash/cordials: Ice tea, lemonade etc.*

*Sport and energy drinks: lucozade, redbull etc.*

**K1. How many times a week does your child usually drink soft drinks?**

- Never
- Less than once a week
- Once a week
- 2-4 days a week
- 5-6 days a week
- Every day, once a day
- Every day, more than once a day

**K2. In which situation(s) is your child most likely to drink soft drinks?**

*You may tick more than one boxes*

- During the weekend
- Breakfast
- Lunch
- Dinner
- At school
- While watching television
- As a thirst quencher between meal
- During/after sports
- At birthdays/parties
- (S)he never drinks fruit juices

**K3. On a day that your child drinks soft drinks, how many glass(es), can(s) or bottle(s) does (s)he drink? Please tick a box in every column**

a. Glasses or small bottles (250 ml)

b. Cans (330ml)

c. Bottles (500 ml)

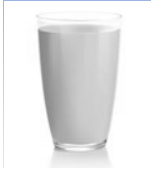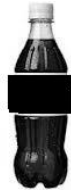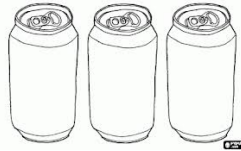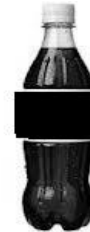

- None
- 1 glass/small bottle
- 2 glasses/small bottles
- 3 glasses/ small bottles
- 4glasses/ small bottles
- 5 or more glasses/ small bottles

- None
- 1 can
- 2 cans
- 3 cans
- 4 cans
- 5 or cans

- None
- 1 bottle
- 2 bottles
- 3 bottles
- 4 bottles
- 5 or more bottles

**K4. There are soft drinks available at home for my child.**

**K5. I pay attention to the amount of soft drinks my child drinks.**

- Always
- Often
- Sometimes
- Not often
- Never

- Always
- Often
- Sometimes
- Not often
- Never

**K6. If my child asks for soft drinks, I will give it to him/her.**

**K7. My child is allowed to take soft drinks whenever (s)he wants.**

- Always
- Often
- Sometimes
- Not often
- Never

- Always
- Often
- Sometimes
- Not often
- Never

**K8. How often do you tell your child that soft drinks are not good for him/her?**

- Always
- Often
- Sometimes
- Not often
- Never

**K9. How often do you tell your child that soft drinks make him/her fat?**

- Always
- Often
- Sometimes
- Not often
- Never

**K10. If I would like to drink soft drinks, I would restrain myself because of the presence of my child.**

- Always
- Often
- Sometimes
- Not often
- Never

**K11. If I prohibit my child from drinking soft drinks, (s)he tries to drink anyway.**

- Always
- Often
- Sometimes
- Not often
- Never

**K12. If I prohibit my child from drinking soft drinks, I find it difficult to stick to my rule(s) if (s)he starts negotiating**

- Always
- Often
- Sometimes
- Not often
- Never

**K13. I give soft drinks to my child as a reward or to comfort him/her.**

- Always
- Often
- Sometimes
- Not often
- Never

Student number

**K14. How often do you (one parent/ spouse/partner or both) drink soft drinks together with your child?**

- Never
- Less than once a week
- Once a week
- 2-4 days a week
- 5-6 days a week
- Every day, once a day
- Every day, more than once a day

Some questions about diet soft drinks

**D1. How many times a week does your child usually drink diet soft drinks?**

- Never
- Less than once a week
- Once a week
- 2-4 days a week
- 5-6 days a week
- Every day, once a day
- Every day, more than once a day

**D2. On a day that your child drinks diet soft drinks, how many glasses, cans or bottles does (s)he drink? Please tick a box in every column**

a. Glasses or small bottles (250 ml)

b. Cans (330ml)

c. Bottles (500 ml)

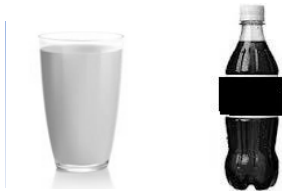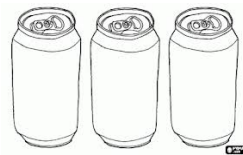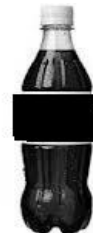

- None
- 1 glass/small bottle
- 2 glasses/small bottles
- 3 glasses/ small bottles
- 4 glasses/ small bottles
- 5 or more glasses/ small bottles

- None
- 1 can
- 2 cans
- 3 cans
- 4 cans
- 5 or cans

- None
- 1 bottle
- 2 bottles
- 3 bottles
- 4 bottles
- 5 or more bottles

### Questions about your child's screen behaviour

*For the following questions, when we say watching television, we mean also watching DVD's, videos and watching films in the computer.*

*By computer games, we mean also games in mobile phone/computer/ tablets and consoles (e.g. playstation)*

#### T1. About how many hours a day does your child usually watch television in his/her free time?

##### a. Weekdays (average of all weeks)

- None at all
- 30 minutes/day
- 1,0 hour/day
- 1,5 hours/day
- 2,0 hours/ day
- 2,5 hours/ day
- 3,0 hours/ day
- 3,5 hours/ day
- 4,0 or more hours/ day

##### b. Weekend days (average of all weekends)

- None at all
- 30 minutes/day
- 1,0 hour/day
- 1,5 hours/day
- 2,0 hours/ day
- 2,5 hours/ day
- 3,0 hours/ day
- 3,5 hours/ day
- 4,0 or more hours/ day

#### T2. TV is available in my child's room.

- Yes
- No

#### T3. How often is the TV on during dinner (supper/ evening meal) in your home?

- Every day
- 4-6 days a week
- 1-3 days a week
- Less than 1 day week
- Never

**T4. About how many hours a day does your child usually plays computer games or uses the computer for leisure activities? Please tick one box in every column**

a. Weekdays (average of all weeks)

- None at all
- 30 minutes/day
- 1,0 hour/day
- 1,5 hours/day
- 2,0 hours/ day
- 2,5 hours/ day
- 3,0 hours/ day
- 3,5 hours/ day
- 4,0 or more hours/ day

b. Weekend days (average of all weekends)

- None at all
- 30 minutes/day
- 1,0 hour/day
- 1,5 hours/day
- 2,0 hours/ day
- 2,5 hours/ day
- 3,0 hours/ day
- 3,5 hours/ day
- 4,0 or more hours/ day

*For questions T5-T13, please tick one box in column a AND b.*

**T5. I pay attention to the amount of the time my child:**

a. watches TV

- Always
- Often
- Sometimes
- Not often
- Never

b. plays computer games

- Always
- Often
- Sometimes
- Not often
- Never

**T6. If my child asks if (s)he is allowed to watch TV/play computer games I will allow it:**

a. watch TV

- Always
- Often
- Sometimes
- Not often
- Never

b. play computer games

- Always
- Often
- Sometimes
- Not often
- Never

**T7. My child is allowed to watch TV/play computer games whenever (s)he wants:**

a. watch TV

- Always
- Often
- Sometimes
- Not often
- Never

b. play computer games

- Always
- Often
- Sometimes
- Not often
- Never

**T8. I negotiate with my child how much (s)he is allowed to watch TV/play computer games:**

a. watch TV

- Always
- Often
- Sometimes
- Not often
- Never

b. play computer games

- Always
- Often
- Sometimes
- Not often
- Never

**T9. If I would like to watch TV/use the computer for leisure time, I would restrain myself because of the presence of my child.**

a. watch TV

- Always
- Often
- Sometimes
- Not often
- Never

b. use computer

- Always
- Often
- Sometimes
- Not often
- Never



**T10. If I prohibit my child to watch TV/use the computer for leisure time, (s)he would do it anyway.**

a. watch TV

- Always
- Often
- Sometimes
- Not often
- Never

b. use computer

- Always
- Often
- Sometimes
- Not often
- Never

**T11. If I prohibit my child from watching TV/playing computer games, I find it difficult to stick to my rule(s) if (s)he starts negotiating:**

a. watching TV

- Always
- Often
- Sometimes
- Not often
- Never

b. playing computer games

- Always
- Often
- Sometimes
- Not often
- Never

**T12. I allow my child to watch TV/ play computer games as a reward or to comfort him/her.**

a. watch TV

- Always
- Often
- Sometimes
- Not often
- Never

b. play computer games

- Always
- Often
- Sometimes
- Not often
- Never

**T13. How often do you and/or spouse/ partner watch television/play computer games together with your child?**

a. watch TV

- Always
- Often
- Sometimes
- Not often
- Never

b. play computer games

- Always
- Often
- Sometimes
- Not often
- Never

**T14. How often do you tell to your child that watching TV/playing computer games is not good for him/her?**

- Always
- Often
- Sometimes
- Not often
- Never

**T15. How often do you tell to your child that watching TV/playing computer games makes him/her fat?**

- Always
- Often
- Sometimes
- Not often
- Never

**a. Some questions about your child's sleep**

**L1. Does your child have a set daily routine for bedtime?**

- Yes
- No

**L2. How many hours a night does your child sleep?**

*Please tick one box in every column*

a. Weekdays(average per night)

- 6-7 hours
- 8-9 hours
- 10-11 hours
- 12 or more hours

b. Weekend days (average per night)

- 6-7 hours
- 8-9 hours
- 10-11 hours
- 12 or more hours

**L3. What time does your child usually goes to bed?**

a. Weekdays (average of all weeks)

- At 18.00 o'clock
- At 19.00 o'clock
- At 20.00 o'clock
- At 21.00 o'clock
- At 22.00 o'clock
- At 23.00 o'clock
- After 23.00 o'clock

b. Weekend days (average of all weekends)

- At 18.00 o'clock
- At 19.00 o'clock
- At 20.00 o'clock
- At 21.00 o'clock
- At 22.00 o'clock
- At 23.00 o'clock
- After 23.00 o'clock

**L4. What time does your child usually wake up?**

a. Weekdays(average of all weeks)

- At 05.00 o'clock or earlier
- At 06.00 o'clock
- At 07.00 o'clock
- At 08.00 o'clock
- At 09.00 o'clock
- After 09.00 o'clock

b. Weekend days (average of all weekends)

- At 05.00 o'clock or earlier
- At 06.00 o'clock
- At 07.00 o'clock
- At 08.00 o'clock
- At 09.00 o'clock
- After 09.00 o'clock

**c. Some questions about your child's weight**

**W1. What do you think about your child's weight?**

- My child's weight is ok
- My child's weight is a bit too much
- My child's weight is way too much
- My child's weight is a bit too little
- My child's weight is way too little

Please look carefully the picture below and answer the following questions:

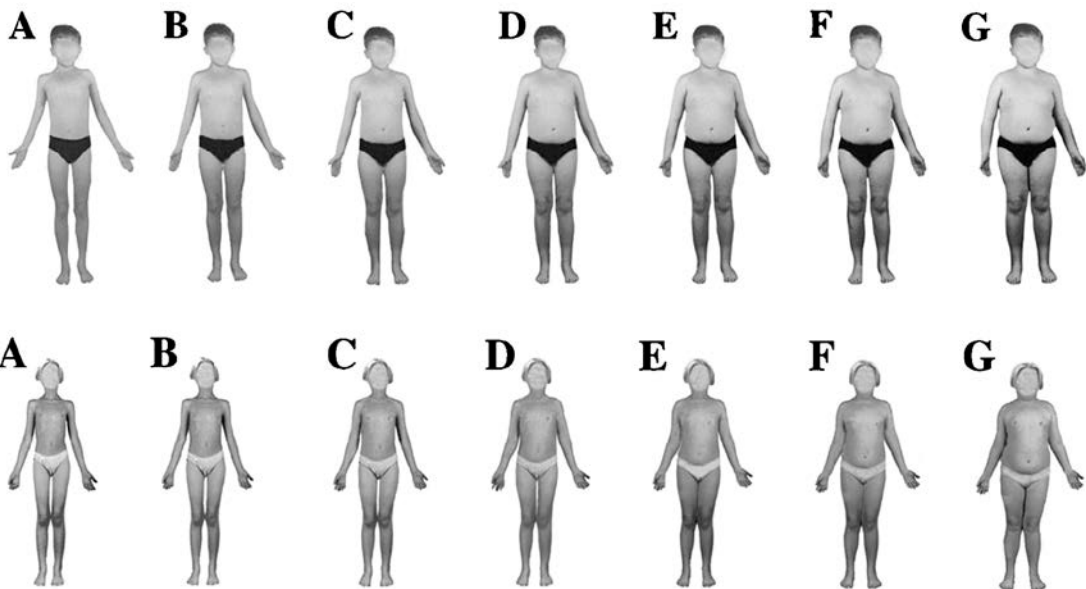

**W2. Choose at the figure that you think most accurately represents your child at this moment**

Write down the letter of the figure

**W3. Choose the figure that you think that represents the one you think would be the best for your child**

Write down the letter of the figure

**Thank you for completing this questionnaire!**
